# Supplementary material for: The Effects of Sister-Store Presence and Market Competition on Product Assortment: Evidence from Book Retailing
Source: Atypon-hosted journal article supplement (doi:10.1287/serv.2021.0275), 2021-09-01
Supplement: serv.2021.0275.sm1.pdf [file serv.2021.0275.sm1.pdf]

**Online Appendix of “The Effects of Sister-Store Presence and Market Competition on Product Assortment: Evidence from Book Retailing”**

**Comparing the Main Model - Results of All Books**

|                        | <b>GMM<br/>Product Assortment of All<br/>Books<br/>Treat <i>Competition</i> as<br/>endogenous and <i>SisStorePres</i> as<br/>exogenous variables</b> | <b>GMM<br/>Product Assortment of All<br/>Books<br/>Treat both <i>Competition</i> and<br/><i>SisStorePres</i> as endogenous<br/>variables</b> |
|------------------------|------------------------------------------------------------------------------------------------------------------------------------------------------|----------------------------------------------------------------------------------------------------------------------------------------------|
| <i>Competition</i>     | .016*<br>(.008)                                                                                                                                      | .016*<br>(.009)                                                                                                                              |
| <i>SisStorePres</i>    | -.020***<br>(.006)                                                                                                                                   | -.020**<br>(.009)                                                                                                                            |
| <i>DistWarehouse</i>   | .017**<br>(.008)                                                                                                                                     | .017**<br>(.008)                                                                                                                             |
| <i>CollegeStore</i>    | .005<br>(.007)                                                                                                                                       | .005<br>(.007)                                                                                                                               |
| <i>StoreSize</i>       | .001**<br>(.000)                                                                                                                                     | .001**<br>(.000)                                                                                                                             |
| <i>EmployeeDensity</i> | .003***<br>(.001)                                                                                                                                    | .003***<br>(.001)                                                                                                                            |
| <i>StoreSales</i>      | .005***<br>(.001)                                                                                                                                    | .005***<br>(.001)                                                                                                                            |
| <i>Density</i>         | .000<br>(.001)                                                                                                                                       | .000<br>(.001)                                                                                                                               |
| <i>Income</i>          | .000<br>(.000)                                                                                                                                       | .000<br>(.000)                                                                                                                               |
| <i>CollegePct</i>      | -.032<br>(.039)                                                                                                                                      | -.032<br>(.039)                                                                                                                              |
| <i>Age65Pct</i>        | -.166**<br>(.072)                                                                                                                                    | -.167**<br>(.072)                                                                                                                            |
| <i>MalePct</i>         | -.638***<br>(.213)                                                                                                                                   | -.638***<br>(.213)                                                                                                                           |
| <i>NonwhitePct</i>     | -.020<br>(.017)                                                                                                                                      | -.020<br>(.017)                                                                                                                              |
| <i>Travel30Pct</i>     | -.020<br>(.026)                                                                                                                                      | -.020<br>(.026)                                                                                                                              |
| <i>HouseholdSize</i>   | -.019<br>(.012)                                                                                                                                      | -.019<br>(.012)                                                                                                                              |
| <i>StateDummies</i>    | YES                                                                                                                                                  | YES                                                                                                                                          |
| Number of Obs.         | 575                                                                                                                                                  | 575                                                                                                                                          |

Standard errors are in parentheses. \*\*\*Significantly different from zero,  $p < .01$ . \*\*  $p < .05$ . \*  $p < .10$ . Estimates for constants and state dummy variables are not reported in the table.
